# Supplementary material for: Distribution and Transfer of Plasmid Replicon Families among Multidrug-Resistant Enterococcus faecalis and Enterococcus faecium from Poultry
Source: MDPI journal article supplement (doi:10.3390/microorganisms10061244), 2022-06-17
Supplement: s1 [file s1]

Supplementary Table S1. Multidrug resistance patterns of *Enterococcus faecalis* and *Enterococcus faecium* from poultry.

| Resistance pattern <sup>a, b</sup> | No. isolates (%)          |                           |
|------------------------------------|---------------------------|---------------------------|
|                                    | <i>E. faecalis</i> (n=47) | <i>E. faecium</i> (n=110) |
| Bac Cip Flv                        |                           | 1 (0.9)                   |
| Bac Flv Str                        |                           | 2 (1.8)                   |
| Bac Flv Tet                        |                           | 1 (0.9)                   |
| Bac Lin Nit                        | 1 (2.1)                   | 1 (0.9)                   |
| Bac Lin Tet                        | 1 (2.1)                   |                           |
| Cip Lin Nit                        |                           | 1 (0.9)                   |
| Cip Flv Lin                        | 1 (2.1)                   |                           |
| Cip Lin Nit                        |                           | 1 (0.9)                   |
| Cip Lin Str                        | 1 (2.1)                   |                           |
| Ery Lin Tyl                        | 1 (2.1)                   |                           |
| Flv Lin Syn                        |                           | 1 (0.9)                   |
| Flv Lin Tet                        | 1 (2.1)                   |                           |
| Gen Kan Lin                        | 1 (2.1)                   |                           |
| Gen Kan Tet                        | 3 (6.4)                   |                           |
| Lin Nit Pen                        |                           | 4 (3.6)                   |
| Lin Nit Tet                        | 1 (2.1)                   | 4 (3.6)                   |
| Lin Pen Tet                        |                           | 2 (1.8)                   |
| Lin Str Tet                        | 1 (2.1)                   |                           |
| Lin Syn Tet                        |                           | 3 (2.7)                   |
| Str Syn Tet                        |                           | 1 (0.9)                   |
| Bac Cip Lin Nit                    |                           | 2 (1.8)                   |
| Bac Ery Lin Tet                    |                           | 1 (0.9)                   |
| Bac Ery Lin Tyl                    | 1 (2.1)                   |                           |
| Bac Flv Lin Syn                    |                           | 1 (0.9)                   |
| Bac Flv Lin Tet                    |                           | 1 (0.9)                   |
| Bac Gen Kan Tet                    | 4 (8.5)                   |                           |
| Bac Lin Nit Pen                    |                           | 1 (0.9)                   |
| Bac Lin Str Tet                    | 1 (2.1)                   |                           |
| Bac Lin Tet Tyl                    | 1 (2.1)                   |                           |
| Cip Lin Nit Pen                    |                           | 1 (0.9)                   |
| Cip Lin Nit Tet                    |                           | 1 (0.9)                   |
| Cip Lin Pen Tet                    |                           | 1 (0.9)                   |
| Cip Lin Str Tet                    |                           | 1 (0.9)                   |
| Cip Ery Flv Syn                    |                           | 1 (0.9)                   |
| Cip Ery Lin Nit Tyl                |                           | 1 (0.9)                   |
| Cip Flv Lin Tet                    |                           | 2 (1.8)                   |
| Cip Lin Nit Pen                    |                           | 1 (0.9)                   |
| Cip Lin Nit Tet                    |                           | 1 (0.9)                   |
| Ery Kan Lin Tet                    | 1 (2.1)                   |                           |
| Ery Kan Lin Tyl                    | 1 (2.1)                   |                           |

|                         |          |         |
|-------------------------|----------|---------|
| Ery Lin Tet Tyl         | 1 (2.1)  |         |
| Ery Lin Syn Tet         |          | 2 (1.8) |
| Ery Lin Tet Tyl         | 1 (2.1)  |         |
| Ery Pen Str Tet         |          | 1 (0.9) |
| Flv Lin Syn Tet         |          | 1 (0.9) |
| Gen Kan Lin Pen         |          | 1 (0.9) |
| Gen Kan Lin Tet         | 5 (10.6) |         |
| Gen Kan Lin Nit Tet     |          | 2 (1.8) |
| Kan Lin Str Tet         | 1 (2.1)  |         |
| Kan Lin Tet Tyl         | 1 (2.1)  |         |
| Lin Nit Pen Tet         |          | 4 (3.6) |
| Lin Pen Syn Tet         |          | 1 (0.9) |
| Lin Str Syn Tet         |          | 4 (3.6) |
| Bac Cip Flv Lin Tet     |          | 1 (0.9) |
| Bac Ery Lin Tet Tyl     | 2 (4.3)  |         |
| Bac Flv Lin Pen Tet     |          | 1 (0.9) |
| Bac Gen Kan Lin Nit     | 1 (2.1)  |         |
| Bac Gen Kan Lin Tet     | 1 (2.1)  |         |
| Cip Lin Nit Syn Tet     |          | 3 (2.7) |
| Cip Lin Pen Syn Tet     |          | 1 (0.9) |
| Cip Nit Pen Syn Tet     |          | 1 (0.9) |
| Dap Lin Nit Syn Tet     |          | 1 (0.9) |
| Dap Flv Lin Nit Tet     |          | 1 (0.9) |
| Ery Lin Nit Tet Tyl     | 1 (2.1)  |         |
| Ery Lin Str Tet Tyl     | 1 (2.1)  |         |
| Lin Nit Pen Syn Tet     |          | 3 (2.7) |
| Bac Cip Lin Nit Pen Tet |          | 1 (0.9) |
| Bac Cip Lin Pen Syn Tet |          | 1 (0.9) |
| Bac Ery Flv Kan Lin Tet |          | 1 (0.9) |
| Bac Ery Lin Nit Tet Tyl | 1 (2.1)  |         |
| Bac Flv Gen Kan Lin Tet | 1 (2.1)  |         |
| Bac Flv Lin Str Syn Tet |          | 1 (0.9) |
| Bac Gen Kan Lin Str Tet | 2 (4.3)  |         |
| Bac Lin Nit Pen Syn Tet |          | 3 (2.7) |
| Cip Flv Lin Nit Syn Tet |          | 1 (0.9) |
| Cip Lin Nit Pen Syn Tet |          | 2 (1.8) |
| Ery Gen Kan Lin Tet Tyl | 1 (2.1)  |         |
| Ery Lin Nit Syn Tet Tyl |          | 1 (0.9) |
| Ery Flv Lin Syn Tet Tyl |          | 1 (0.9) |
| Ery Gen Kan Lin Tet Tyl | 1 (2.1)  | 1 (0.9) |
| Ery Gen Lin Nit Tet Tyl |          | 1 (0.9) |
| Ery Lin Pen Syn Tet Tyl |          | 1 (0.9) |
| Gen Kan Lin Nit Pen Tet |          | 1 (0.9) |
| Flv Gen Kan Lin Nit Tgc |          | 1 (0.9) |

|                                                 |         |         |
|-------------------------------------------------|---------|---------|
| Bac Cip Flv Lin Nit Syn Tet                     |         | 1 (0.9) |
| Bac Cip Lin Nit Pen Syn Tet                     |         | 1 (0.9) |
| Bac Cip Lin Nit Str Syn Tet                     |         | 1 (0.9) |
| Bac Ery Gen Kan Lin Tet Tyl                     | 3 (6.4) |         |
| Bac Ery Kan Lin Str Tet Tyl                     | 1 (2.1) |         |
| Bac Flv Lin Nit Pen Syn Tet                     |         | 1 (0.9) |
| Cip Gen Kan Lin Nit Pen Syn                     |         | 1 (0.9) |
| Cip Gen Kan Lin Nit Syn Tet                     |         | 1 (0.9) |
| Cip Ery Lin Nit Syn Tet Tyl                     |         | 1 (0.9) |
| Cip Ery Gen Lin Syn Tet Tyl                     |         | 1 (0.9) |
| Cip Ery Lin Pen Syn Tet Tyl                     |         | 1 (0.9) |
| Cip Flv Lin Nit Pen Syn Tet                     |         | 1 (0.9) |
| Cip Lin Nit Pen Str Syn Tet                     |         | 1 (0.9) |
| Ery Gen Kan Lin Nit Pen Tyl                     |         | 1 (0.9) |
| Ery Lin Nit Pen Syn Tet Tyl                     |         | 1 (0.9) |
| Ery Flv Lin Nit Syn Tet Tyl                     |         | 1 (0.9) |
| Ery Gen Kan Lin Syn Tet Tyl                     |         | 1 (0.9) |
| Bac Cip Flv Gen Kan Lin Nit Pen                 |         | 1 (0.9) |
| Bac Cip Flv Lin Nit Pen Syn Tet                 |         | 1 (0.9) |
| Bac Dap Gen Kan Lin Nit Pen Syn                 |         | 1 (0.9) |
| Bac Ery Flv Kan Lin Pen Str Tyl                 |         | 1 (0.9) |
| Bac Ery Gen Kan Lin Str Tet Tyl                 | 1 (2.1) |         |
| Cip Ery Kan Lin Nit Str Tet Tyl                 |         | 1 (0.9) |
| Ery Gen Kan Lin Str Syn Tet Tyl                 |         | 1 (0.9) |
| Ery Kan Lin Nit Str Syn Tet Tyl                 |         | 1 (0.9) |
| Ery Lin Nit Pen Str Syn Tet Tyl                 |         | 1 (0.9) |
| Gen Kan Lin Nit Pen Str Syn Tet                 |         | 1 (0.9) |
| Cip Ery Flv Lin Nit Pen Syn Tet Tyl             |         | 1 (0.9) |
| Cip Flv Lin Nit Pen Str Syn Tet Tgc             |         | 1 (0.9) |
| Bac Chl Cip Dap Flv Gen Kan Nit Pen Str Tet Tyl |         | 1 (0.9) |

<sup>a</sup>Bac=bacitracin, Chl=chloramphenicol, Cip=ciprofloxacin, Dap=daptomycin, Ery=erythromycin, Flv=flavomycin, Gen=gentamicin, Kan=kanamycin, Lin=lincomycin Nit=nitrofurantoin, Pen=penicillin, Str=streptomycin, Syn=Synercid (Quinupristin/Dalfopristin), Tet=tetracycline, Tyl=tylosin

<sup>b</sup>Font colors: Black=*E. faecalis*, Red=*E. faecium*, Blue=*E. faecalis* and *E. faecium*
